# Supplementary material for: SlWUS1; An X-linked Gene Having No Homologous Y-Linked Copy inSilene latifolia
Source: Oxford University Press journal article supplement (doi:10.1534/g3.112.003749), 2012-10-01
Supplement: 1269_003749si.pdf [file 1269_003749si.pdf]

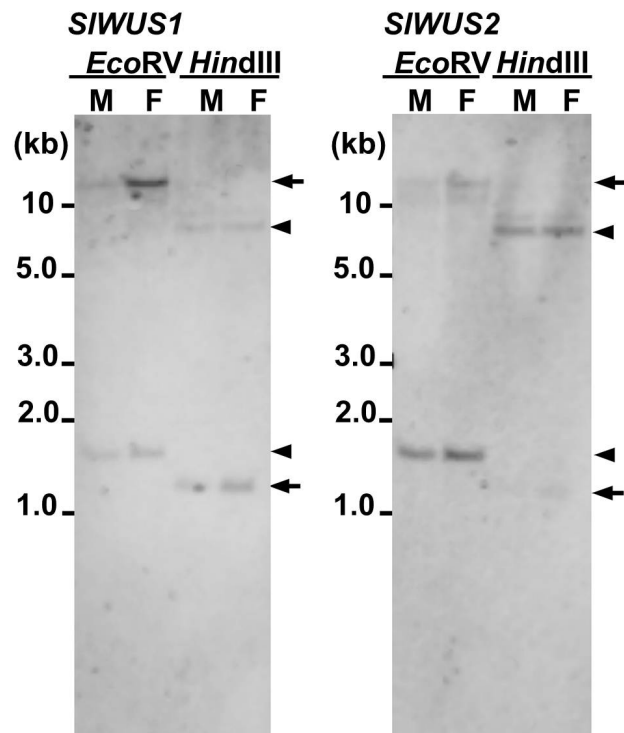

**Figure S1** Southern blot analysis of *SIWUS* genes under low stringency conditions. Male and female genomic DNAs digested with *EcoRV* and *HindIII* were hybridized with probes that are complementary to the highly conserved homeodomain regions under low stringency conditions (See Materials and Methods). Both probes cross-hybridized to the other copies. Arrows and arrow heads indicate signals for *SIWUS1* and *SIWUS2*, respectively.

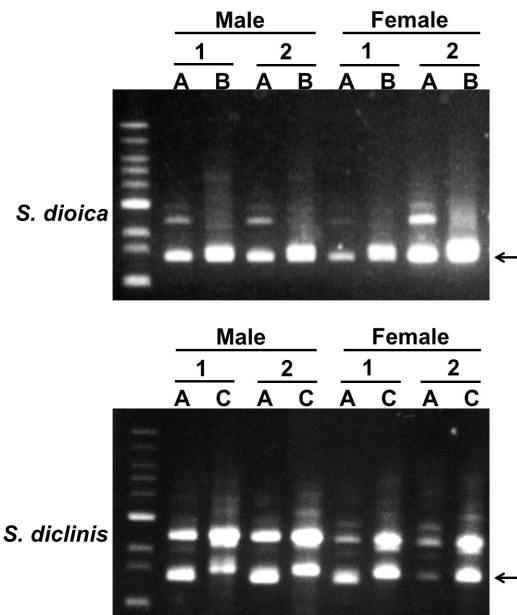

**Figure S2** An example of PCR analysis for detecting *SIWUS1* and *SIWUS2* orthologues in other dioecious species using degenerate primer sets. Genomic DNAs isolated from Individual two male and female plants were used. A, B and C indicates the name of primer sets (A, kWUS5f: 5'-TGG TTY CAR AAY CAT AAA GC-3' and kWUS2r: 5'-TCY BCR TGC ATN GGR AAT AG-3'; B, kWUS6f: 5'- TGG TTY CAR AAY CAC AAA GC-3' and kWUS2r; C, kWUS7f: 5'- TGG TTY CAR AAY CAT AAG GC-3' and kWUS2r). Several fragments were amplified in some PCRs and all fragments were cloned and sequenced. As a result, 1.6 kb and 1.7 kb fragments (indicated by an arrow in each panel) were identified as *SIWUS1* and *SIWUS2* orthologues, respectively. None of Y-specific fragment was detected.

**Table S1** List of oligonucleotide primers used for sequencing *WUS* orthologues.

| Primer name | Sequence (5'-3')                  |
|-------------|-----------------------------------|
| SIWUS1F8    | ATC TCA ACA AGT CCT TCT CTT GCA G |
| SIWUS1F9    | CCC CCA CAT TAC CAT AAC TCC CTC T |
| SIWUS1R6    | TTG GGG AGG ATC AAG TCT TTT GCT T |
| SIWUS1R7    | TAA GAA AAC GAC TCC CCT ATA CGG A |
| dicWUS1R1   | TGT CTC TAT CTC GGA TAC TGC AAC A |
| dioWUS_SR1  | CTG GAG GTG GGC AAT TAG TAG GGA   |
| SIWUS1_r1   | TAT GCG GTG ACC ACT GCA TCA A     |
| SIWUS1_sR3  | ATG CTT GTT CTT GGC TCT TCA TT    |
| SIWUS1_sR4  | ACT CCA ATT TAG GTG ATT TAC TGG G |
| SIWUS2_F9   | TCA GTT TCA TCC TTC ATT CCT TCC A |
| SIWUS2_F10  | AAA TGG AAG GAC AAC CAA ACC AAC T |
| SIWUS2_R4   | CAT CAA CGG GTC TTG TTC CTC TCT T |
| SIWUS2_R5   | CCA AGT AGA GAA TTA GAG AGA ACC T |
| SIWUS2_f1   | AGG CTA GGG AGA GAC AGA AG        |
| SIWUS2_r1   | CTC TAT CTC TGG CTG TGC TA        |
| SIWUS2_sF3  | CTT ACA GTA TTA AGA CAG CAA CAC C |
| SIWUS2_sF4  | ACT AAT CAT TTA TTC GGT GGG TCT T |

**Table S2** List of oligonucleotide primers used in HRM.

| Gene          | Primer name | Sequence (5'-3')              |
|---------------|-------------|-------------------------------|
| <i>DD44X</i>  | DD44XhF     | CCC TGC CCG AGA ATT TCC TG    |
|               | DD44XhR     | TGG AAG GCT GAG GCA TGT GG    |
| <i>SIWUS1</i> | SIWUS1hF    | TGC AAT GAA AGG GGG CAA AG    |
|               | SIWUS1hR    | TGA AGA GCC AAG AAC AAG CAT   |
| <i>SIX1</i>   | SIX1hF      | AGT GGA GTT GGA TCA CCT GTT C |
|               | SIX1hR      | TAT GCG GTG ACC ACT GCA TCA A |
| <i>SIX4</i>   | SIX4hF      | CAA GAA TGC TGC AAT ACA GTC A |
|               | SIX4hR      | CTG GAT CTA CTT CAG AGA CAC C |

**Table S3** Result of QRT-PCR on inter-strain cross between the K-line male and a B female using allele specific primers of *SIWUS1*.

| Samples | Relative expression level (K/B) | Standard deviation |
|---------|---------------------------------|--------------------|
| F1-1    | 1.13                            | 0.07               |
| F1-2    | 1.09                            | 0.19               |
| F1-3    | 0.872                           | 0.21               |

Relative expression level in K-line and B-line could not be calculated, because they expressed only one individual allele.
