# Supplementary material for: SlWUS1; An X-linked Gene Having No Homologous Y-Linked Copy inSilene latifolia
Source: Oxford University Press journal article supplement (doi:10.1534/g3.112.003749), 2012-10-01
Supplement: 1269_figures1.pdf [file 1269_figures1.pdf]

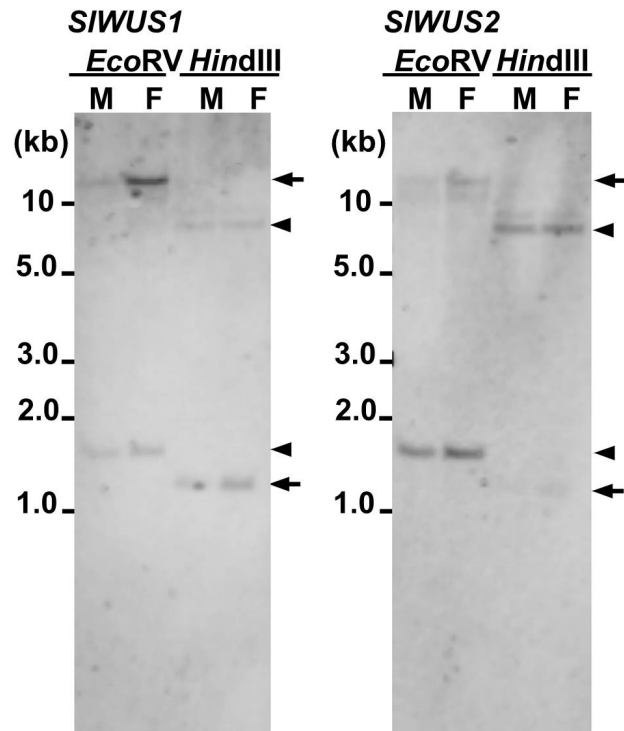

**Figure S1** Southern blot analysis of *SIWUS* genes under low stringency conditions. Male and female genomic DNAs digested with *EcoRV* and *HindIII* were hybridized with probes that are complementary to the highly conserved homeodomain regions under low stringency conditions (See Materials and Methods). Both probes cross-hybridized to the other copies. Arrows and arrow heads indicate signals for *SIWUS1* and *SIWUS2*, respectively.
