# Supplementary material for: SlWUS1; An X-linked Gene Having No Homologous Y-Linked Copy inSilene latifolia
Source: Oxford University Press journal article supplement (doi:10.1534/g3.112.003749), 2012-10-01
Supplement: 1269_figures2.pdf [file 1269_figures2.pdf]

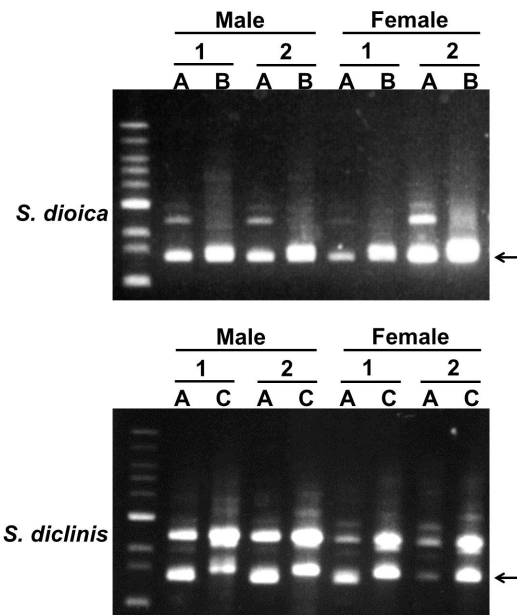

**Figure S2** An example of PCR analysis for detecting *SIWUS1* and *SIWUS2* orthologues in other dioecious species using degenerate primer sets. Genomic DNAs isolated from Individual two male and female plants were used. A, B and C indicates the name of primer sets (A, kWUS5f: 5'-TGG TTY CAR AAY CAT AAA GC-3' and kWUS2r: 5'-TCY BCR TGC ATN GGR AAT AG-3'; B, kWUS6f: 5'- TGG TTY CAR AAY CAC AAA GC-3' and kWUS2r; C, kWUS7f: 5'- TGG TTY CAR AAY CAT AAG GC-3' and kWUS2r). Several fragments were amplified in some PCRs and all fragments were cloned and sequenced. As a result, 1.6 kb and 1.7 kb fragments (indicated by an arrow in each panel) were identified as *SIWUS1* and *SIWUS2* orthologues, respectively. None of Y-specific fragment was detected.
