# Supplementary material for: SlWUS1; An X-linked Gene Having No Homologous Y-Linked Copy inSilene latifolia
Source: Oxford University Press journal article supplement (doi:10.1534/g3.112.003749), 2012-10-01
Supplement: 1269_tables1.pdf [file 1269_tables1.pdf]

**Table S1** List of oligonucleotide primers used for sequencing *WUS* orthologues.

| Primer name | Sequence (5'-3')                  |
|-------------|-----------------------------------|
| SIWUS1F8    | ATC TCA ACA AGT CCT TCT CTT GCA G |
| SIWUS1F9    | CCC CCA CAT TAC CAT AAC TCC CTC T |
| SIWUS1R6    | TTG GGG AGG ATC AAG TCT TTT GCT T |
| SIWUS1R7    | TAA GAA AAC GAC TCC CCT ATA CGG A |
| dicWUS1R1   | TGT CTC TAT CTC GGA TAC TGC AAC A |
| dioWUS_SR1  | CTG GAG GTG GGC AAT TAG TAG GGA   |
| SIWUS1_r1   | TAT GCG GTG ACC ACT GCA TCA A     |
| SIWUS1_sR3  | ATG CTT GTT CTT GGC TCT TCA TT    |
| SIWUS1_sR4  | ACT CCA ATT TAG GTG ATT TAC TGG G |
| SIWUS2_F9   | TCA GTT TCA TCC TTC ATT CCT TCC A |
| SIWUS2_F10  | AAA TGG AAG GAC AAC CAA ACC AAC T |
| SIWUS2_R4   | CAT CAA CGG GTC TTG TTC CTC TCT T |
| SIWUS2_R5   | CCA AGT AGA GAA TTA GAG AGA ACC T |
| SIWUS2_f1   | AGG CTA GGG AGA GAC AGA AG        |
| SIWUS2_r1   | CTC TAT CTC TGG CTG TGC TA        |
| SIWUS2_sF3  | CTT ACA GTA TTA AGA CAG CAA CAC C |
| SIWUS2_sF4  | ACT AAT CAT TTA TTC GGT GGG TCT T |
