# Supplementary material for: SlWUS1; An X-linked Gene Having No Homologous Y-Linked Copy inSilene latifolia
Source: Oxford University Press journal article supplement (doi:10.1534/g3.112.003749), 2012-10-01
Supplement: 1269_tables2.pdf [file 1269_tables2.pdf]

**Table S2** List of oligonucleotide primers used in HRM.

| Gene          | Primer name | Sequence (5'-3')              |
|---------------|-------------|-------------------------------|
| <i>DD44X</i>  | DD44XhF     | CCC TGC CCG AGA ATT TCC TG    |
|               | DD44XhR     | TGG AAG GCT GAG GCA TGT GG    |
| <i>SIWUS1</i> | SIWUS1hF    | TGC AAT GAA AGG GGG CAA AG    |
|               | SIWUS1hR    | TGA AGA GCC AAG AAC AAG CAT   |
| <i>SIX1</i>   | SIX1hF      | AGT GGA GTT GGA TCA CCT GTT C |
|               | SIX1hR      | TAT GCG GTG ACC ACT GCA TCA A |
| <i>SIX4</i>   | SIX4hF      | CAA GAA TGC TGC AAT ACA GTC A |
|               | SIX4hR      | CTG GAT CTA CTT CAG AGA CAC C |
