# Supplementary material for: SlWUS1; An X-linked Gene Having No Homologous Y-Linked Copy inSilene latifolia
Source: Oxford University Press journal article supplement (doi:10.1534/g3.112.003749), 2012-10-01
Supplement: 1269_tables3.pdf [file 1269_tables3.pdf]

**Table S3** Result of QRT-PCR on inter-strain cross between the K-line male and a B female using allele specific primers of *SIWUS1*.

| Samples | Relative expression level (K/B) | Standard deviation |
|---------|---------------------------------|--------------------|
| F1-1    | 1.13                            | 0.07               |
| F1-2    | 1.09                            | 0.19               |
| F1-3    | 0.872                           | 0.21               |

Relative expression level in K-line and B-line could not be calculated, because they expressed only one individual allele.
